# Supplementary material for: Copper Complexation of Rosarin: Formation of a Bis-copper Rosarin and a Mono-copper Linear Tridipyrrin
Source: Royal Society of Chemistry journal article supplement (doi:10.1039/d4dt02161d), 2024-01-01
Supplement: d4dt02161d1.pdf [file d4dt02161d1.pdf]

*Electronic Supplementary Information*

**Copper Complexation of Rosarin: Formation of a Bis-copper  
Rosarin and a Mono-copper Linear Tridipyrin**

Xiaojuan Lv,<sup>a</sup> Long Qian,<sup>a</sup> Nikolay V. Tkachenko,<sup>\*,b,c</sup> Tao Zhang,<sup>a</sup> Fengxian Qiu,<sup>\*,a</sup> Naoki Aratani,<sup>\*,d</sup>  
Takahisa Ikeue,<sup>e</sup> Jianming Pan,<sup>a</sup> and Songlin Xue<sup>\*,a</sup>

<sup>a</sup> School of Chemistry and Chemical Engineering, Jiangsu University, 301 Xuefu Road, Zhenjiang 212013, China

<sup>b</sup> Department of Chemistry, University of California, Berkeley, CA 94720, USA

<sup>c</sup> Materials Sciences Division, Lawrence Berkeley National Laboratory, Berkeley, CA 94720, USA

<sup>d</sup> Division of Materials Science, Nara Institute of Science and Technology 8916-5 Takayama-cho, Nara 630-0192, Japan

<sup>e</sup> Department of Materials Chemistry, Graduate School of Natural Science and Technology Shimane University, 1060 Nishikawatsu, Matsue, Shimane 690-8504, Japan

Corresponding author:

\*E-mail: nikolaytkachenko@berkeley.edu (N.V. T); fxqiu@ujv.edu.cn (F. Q);  
aratani@ms.naist.jp (N. A); slxue@ujv.edu.cn (S. X)

## **Table of Contents**

- 1, Supporting Figures and Tables
- 2, Crystal Data
- 3, Cartesian Coordinates

## 1, Supporting figures and tables

Rosarin Cu 1 #13 RT: 0.19 AV: 1 NL: 3.13E6  
T: FTMS + p ESI Full ms [100.0000-1500.0000]

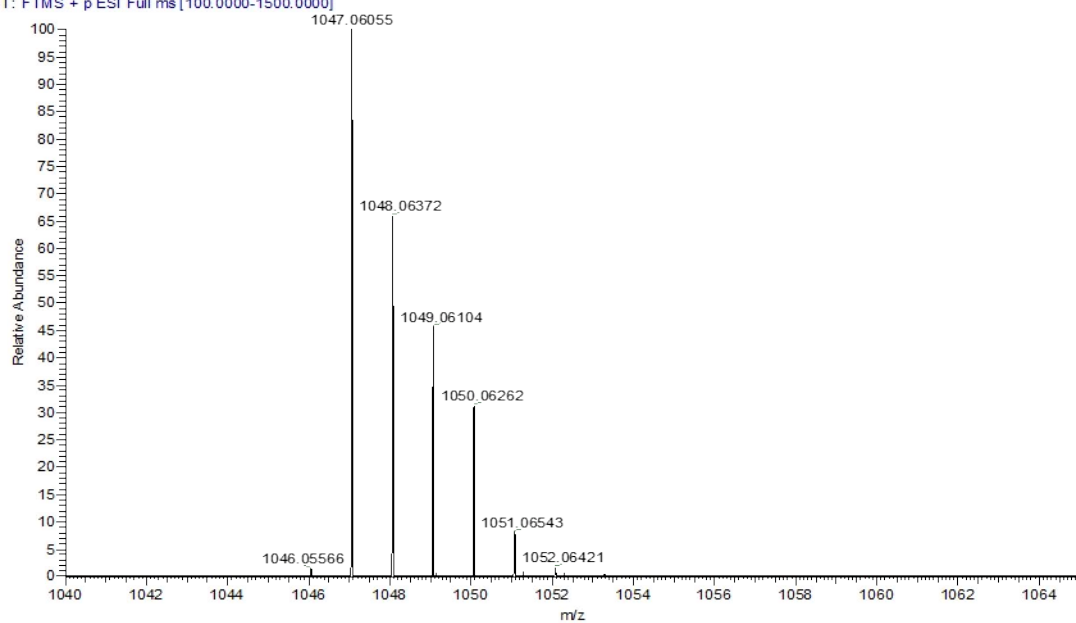

**Figure S1.** HR-APCI mass spectrum of Cu-1..

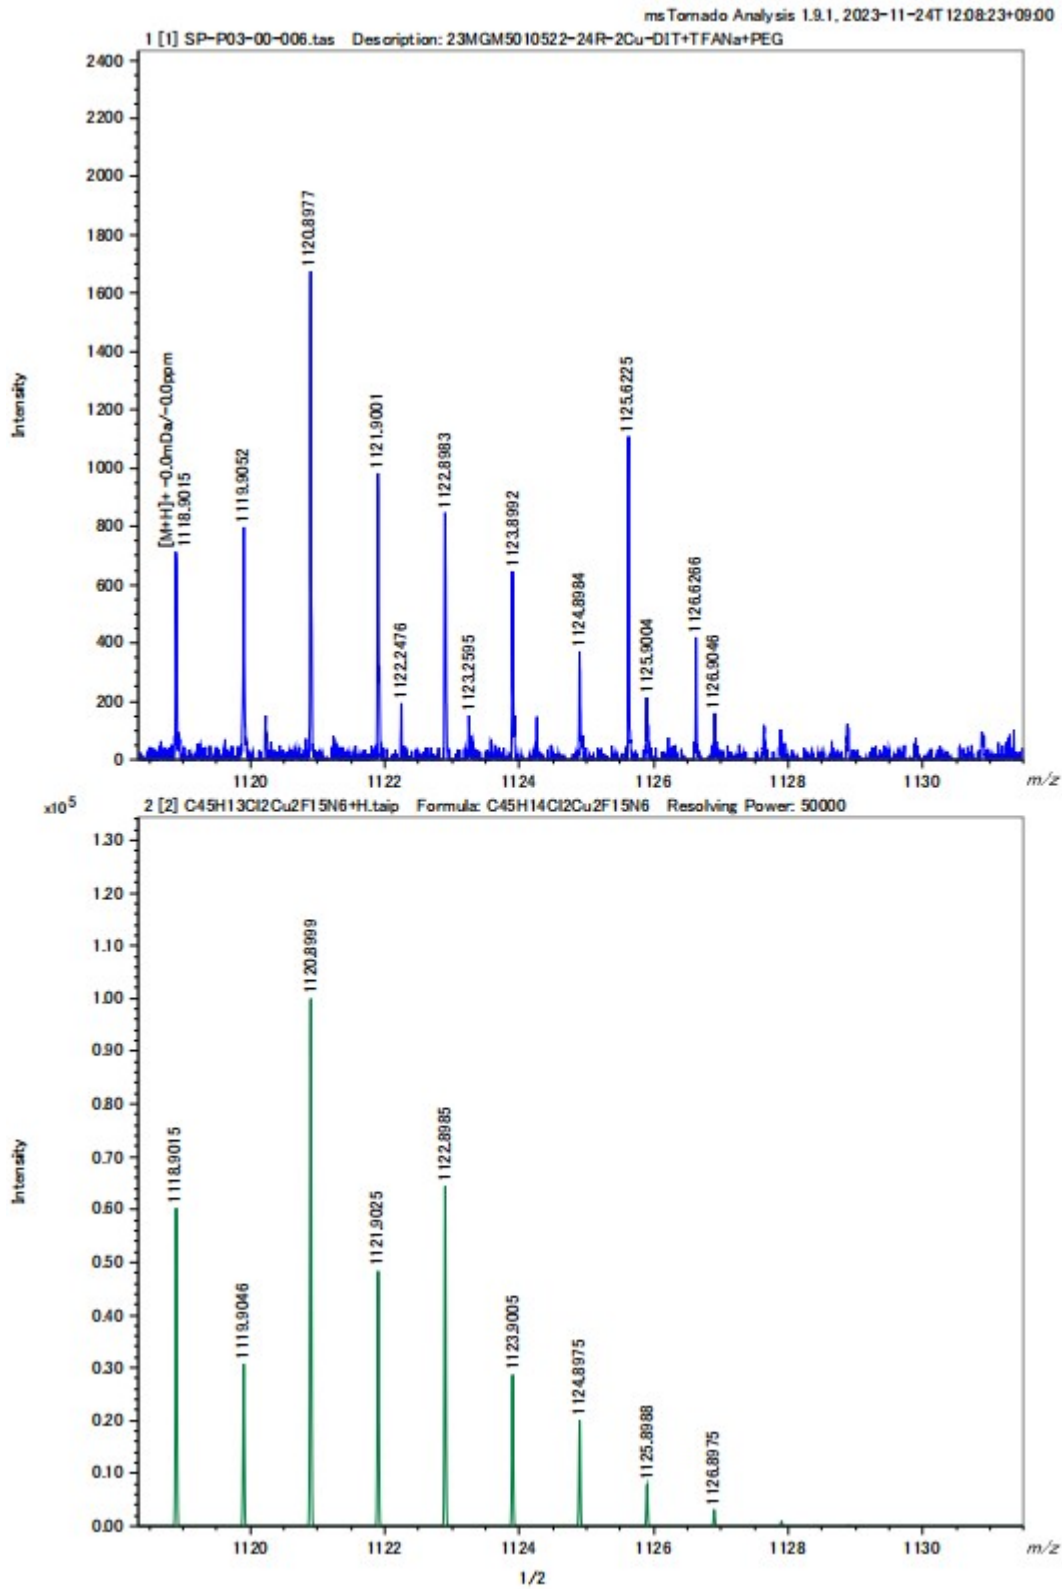

Figure S2. HR-MALDI mass spectrum of 2Cu-1.

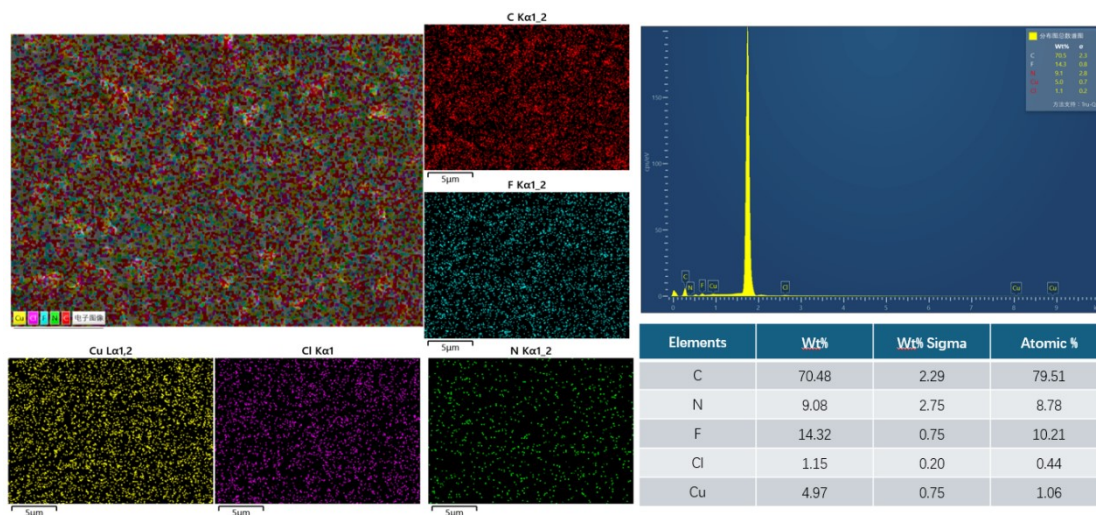

**Figure S3.** EDS elemental distribution of **2Cu-1**.

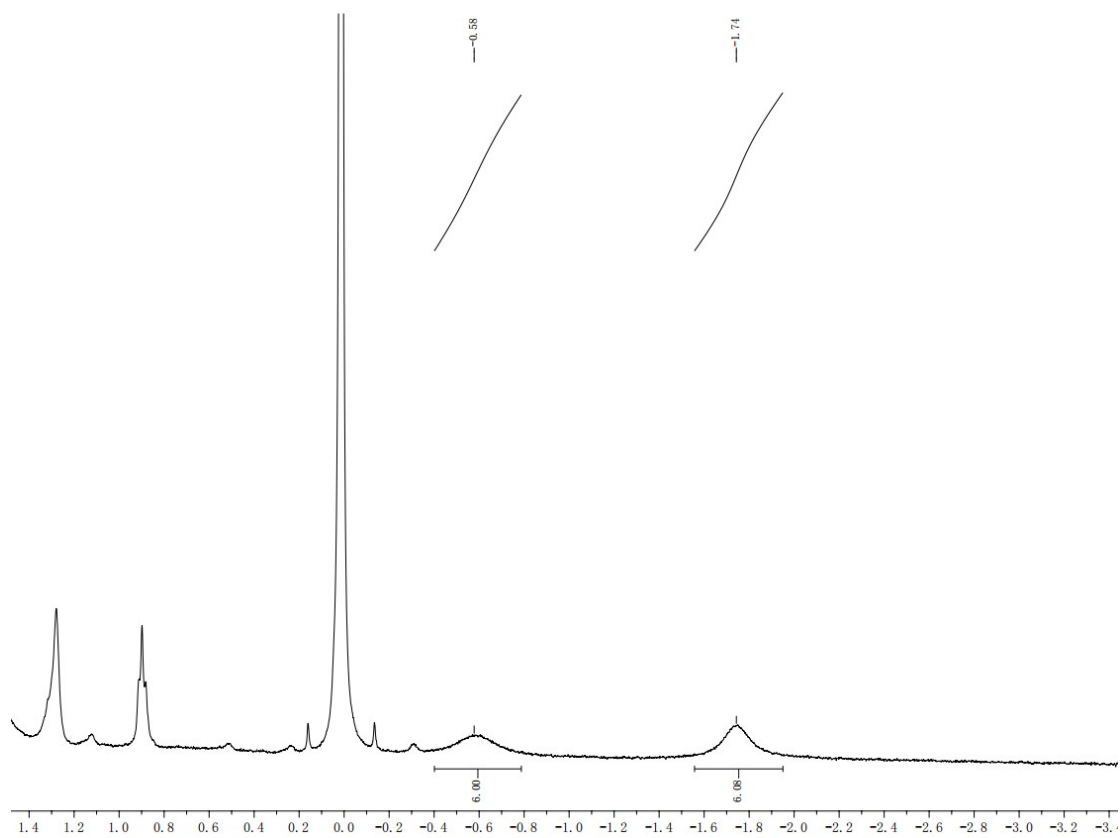

**Figure S4.**  $^1\text{H}$  NMR spectrum of 2Cu-1 in  $\text{CDCl}_3$ .

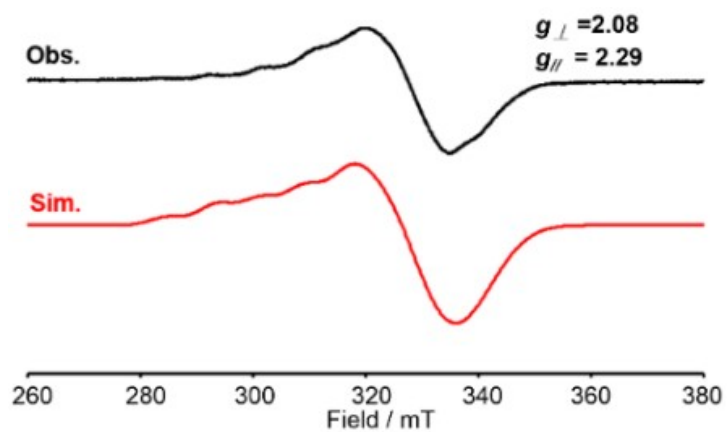

**Figure S5.** Observed and simulated EPR spectra of **2Cu-1** in frozen dichloromethane. The spectrum was obtained at 215 K 0.4  $\mu$ s after the laser excitation pulse with 14.5 mW of microwave power and an integration time of 0.2  $\mu$ s per point.

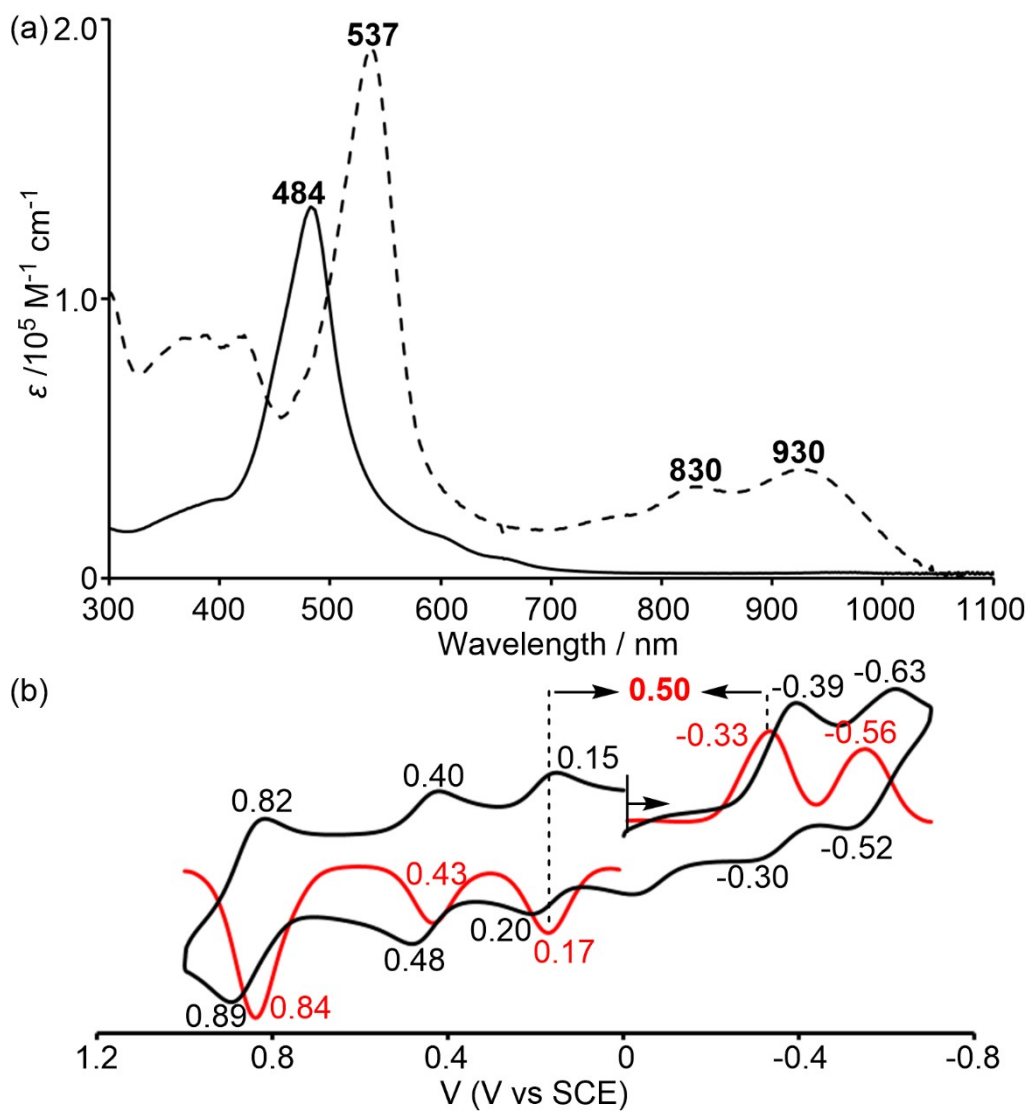

**Figure S6.** (a) UV-vis-NIR absorption spectra of **Cu-1** (black dotted line) and **2Cu-1** (black solid line) in  $\text{CH}_2\text{Cl}_2$ . (b) CV (black line) and DPV (red line) line of **2Cu-1** in  $\text{CH}_2\text{Cl}_2$  (0.1 M TBAP). The scan rate is  $0.1 \text{ V s}^{-1}$ . Forward scan: from negative potential to positive potential.



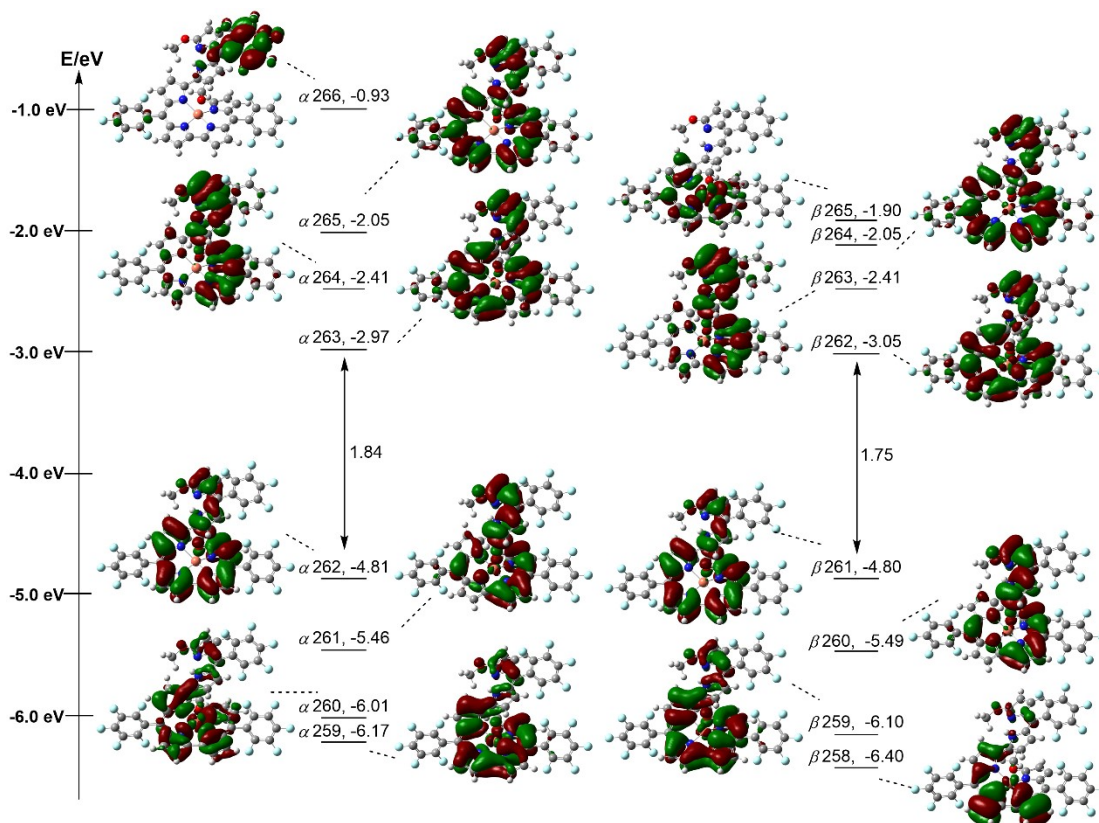

**Figure S7.** Frontier molecular orbitals and energy diagrams of **1Cu-1**, calculated at the UB3LYP/6-31G(d, p) level of theory.

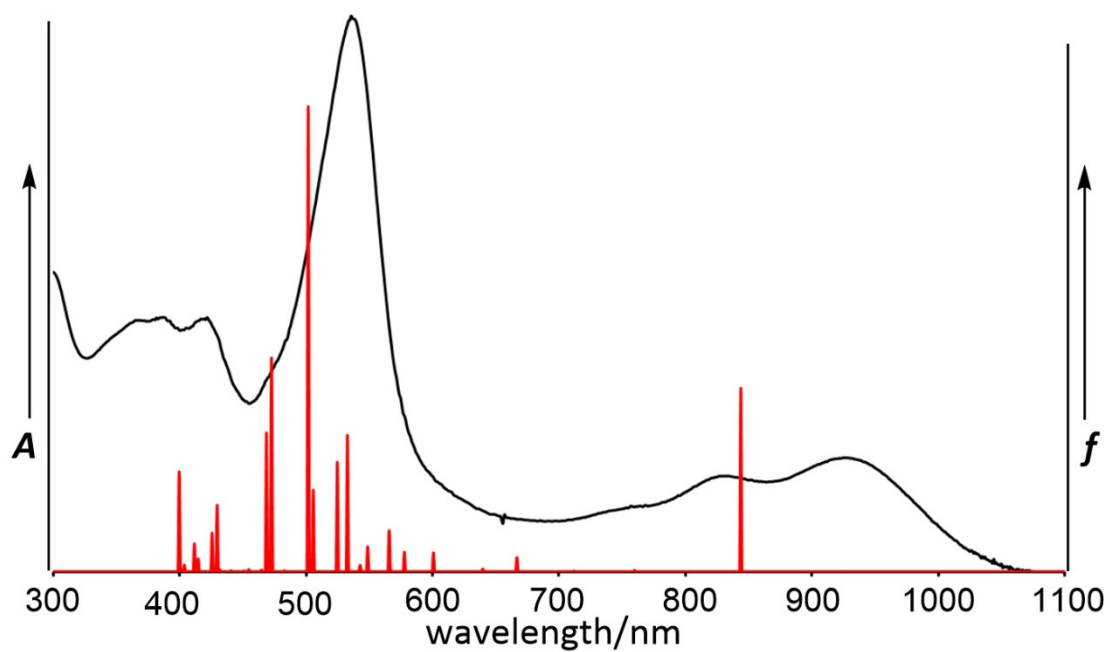

**Figure S8.** The UV-Vis absorption spectrum (black line, left axis) of **1Cu-1** and oscillator strengths (red bar, right axis) is calculated at the UB3LYP/6-31G(d, p) level of theory.

**Table S1.** Major composition, vertical excitation energies ( $E$ , eV/nm) and oscillator strengths ( $f$ ) for the lowest optically allowed excited states of **1Cu-1**, calculated at the UB3LYP/6-31G(d,p) level of theory.

| State | Major Composition         | Exci. (eV/nm) | $f$    |
|-------|---------------------------|---------------|--------|
| 1     | 260B -> 262B (0.47676)    |               |        |
|       | 261B -> 263B (0.47682)    | 1.3339/926.00 | 0.0001 |
| 2     | 261A -> 263A (-0.46125)   |               |        |
|       | 262A -> 263A (0.73356)    |               |        |
|       | 261B -> 262B (0.65432)    | 1.4699/843.51 | 0.1395 |
| 3     | 259A -> 263A (0.41738)    |               |        |
|       | 262A -> 265A (-0.41022)   | 2.4713/501.70 | 0.3538 |
|       | 261B -> 264B (-0.38757)   |               |        |
| 4     | 261A -> 264A<br>(0.41712) |               |        |
|       | 259A -> 263A (0.38576)    | 2.6207/473.10 | 0.1626 |
|       | 260B -> 263B (0.40575)    |               |        |

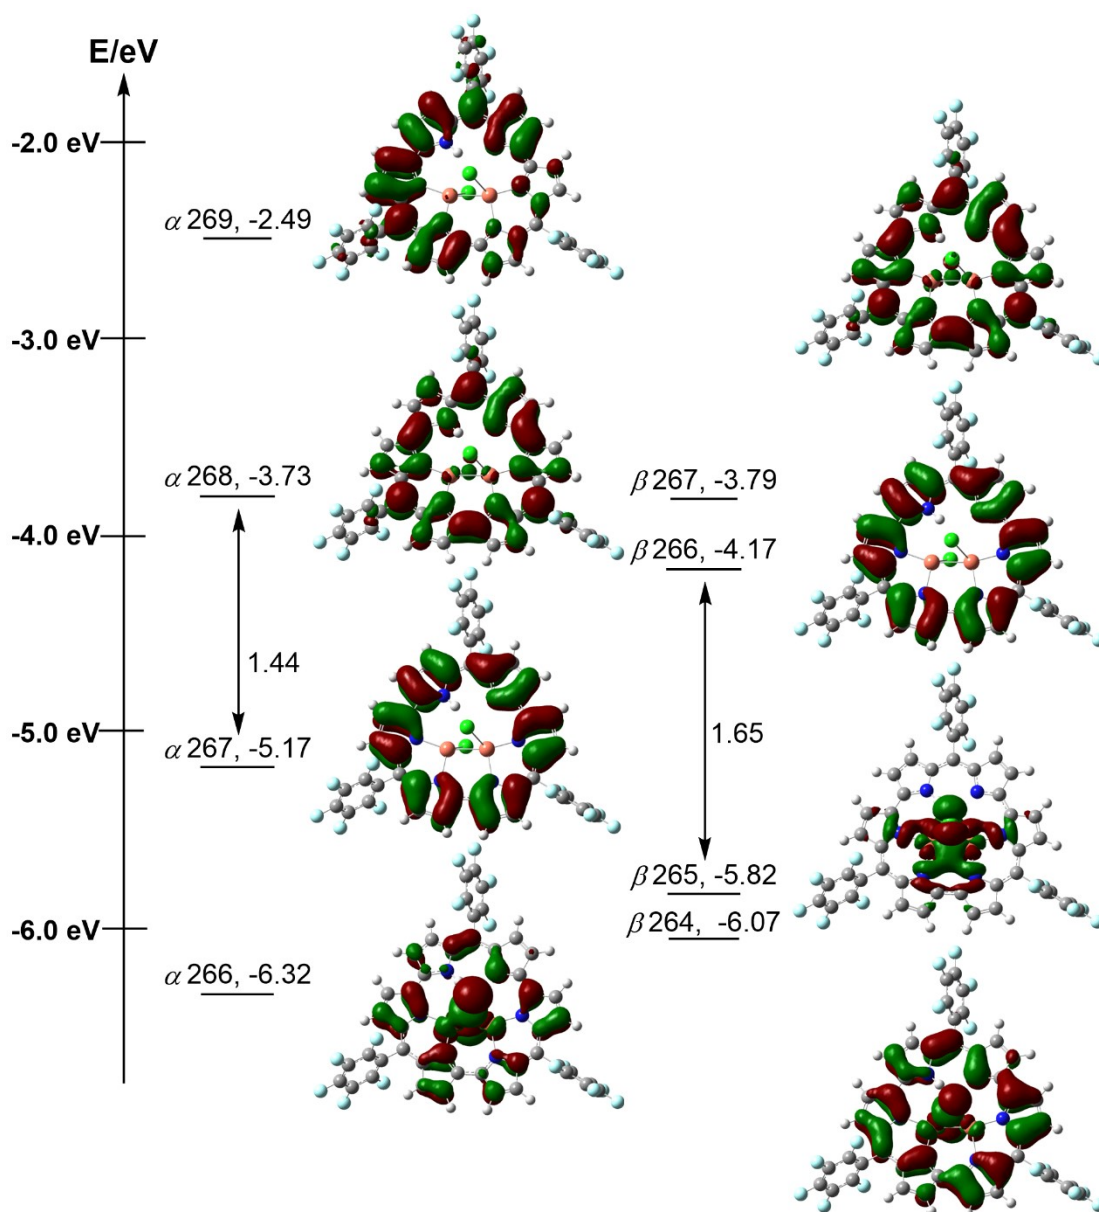

**Figure S9.** Frontier molecular orbitals and energy diagrams of **2Cu-1**, calculated at the UB3LYP/6-31G(d, p) level of theory.

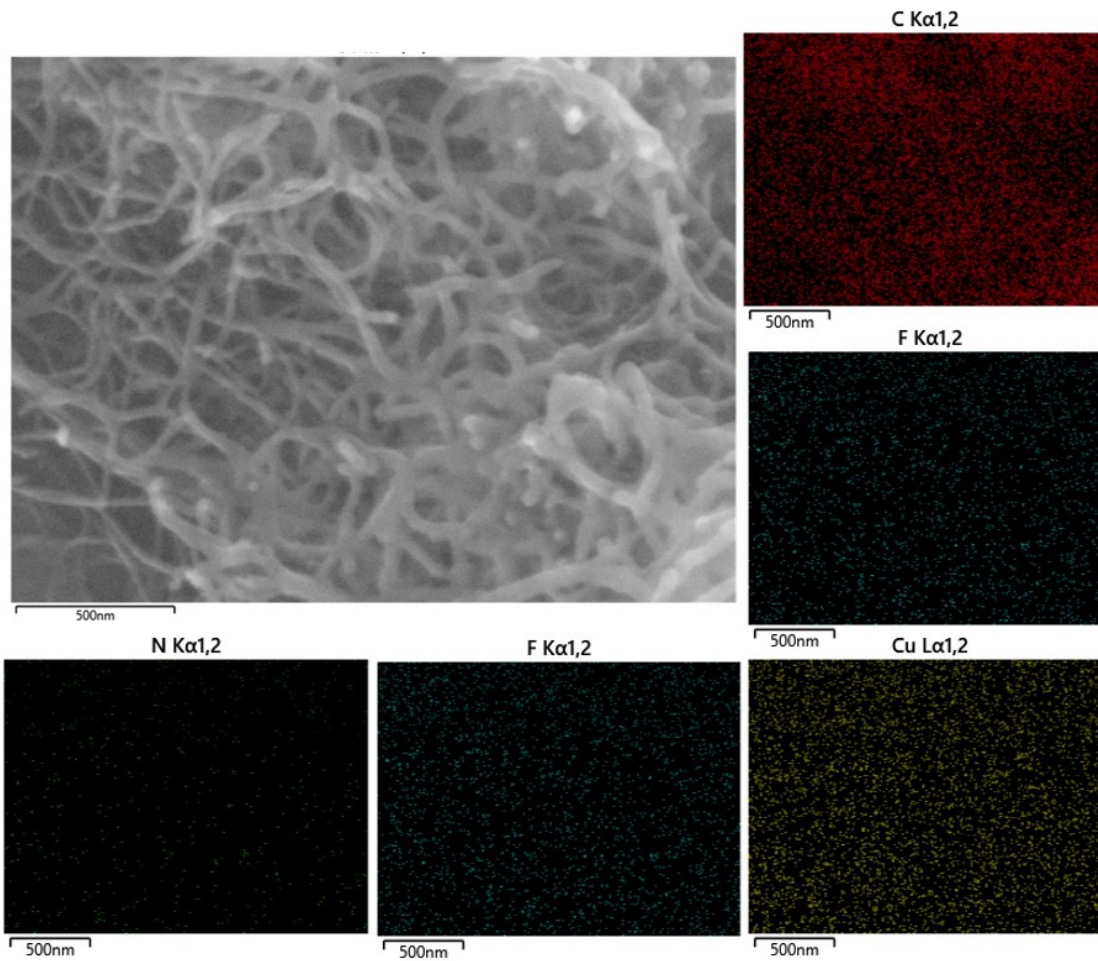

**Figure S10.** SEM and mapping images of 2Cu-1@CNT.

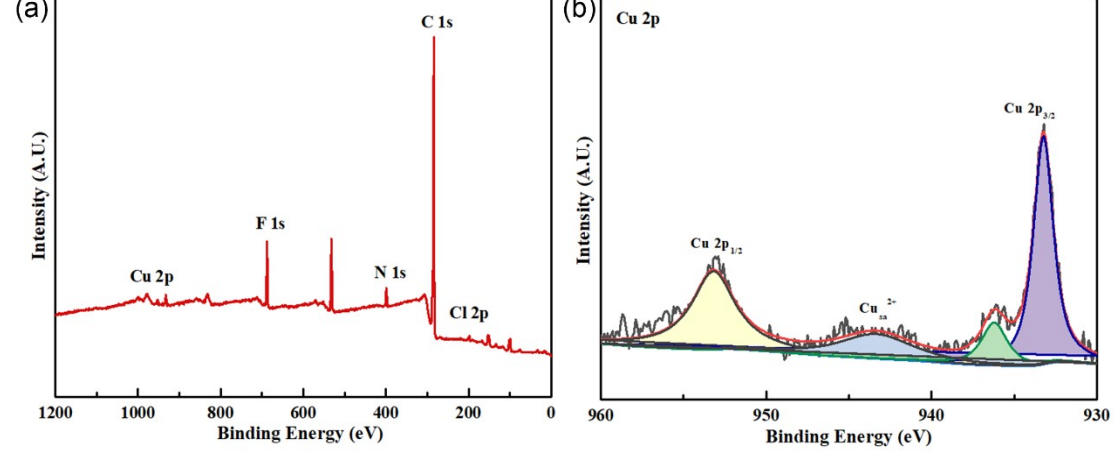

**Figure S11.** XPS scan spectrum of **2Cu-1@CNT** and the corresponding Cu 2p binding energy region.

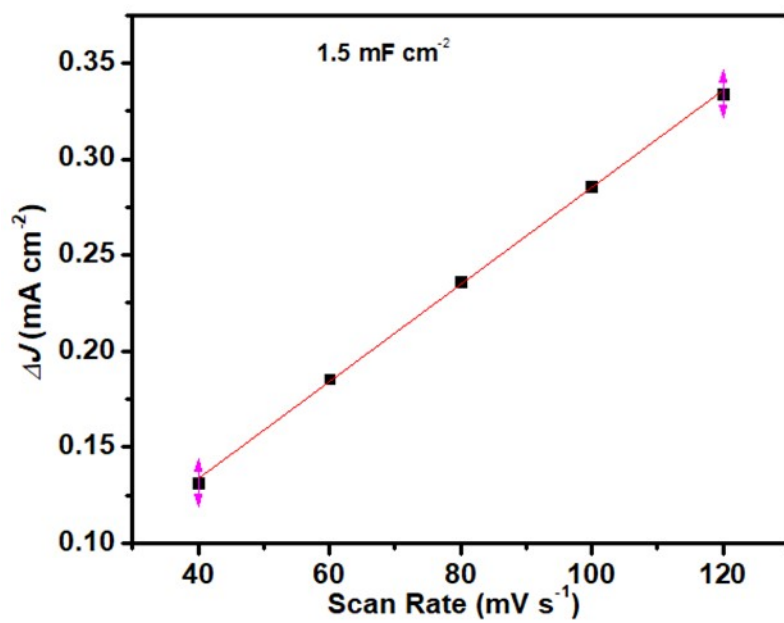

**Figure S12.** Linear fitting of the current densities vs scan rates for 2Cu-1@CNT.

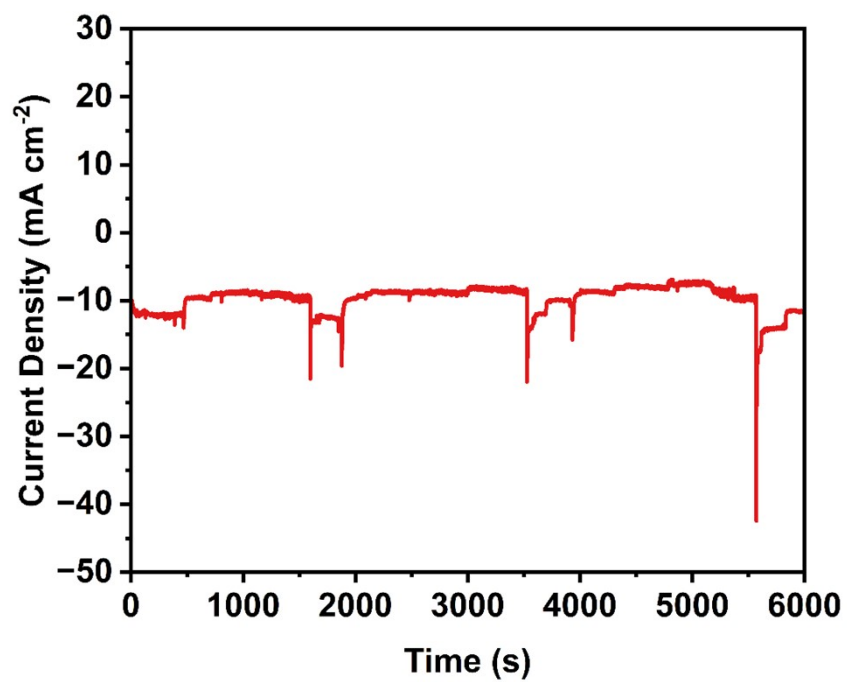

**Figure S13.** Stability test of **2Cu-1@CNT** during electrolysis at -0.6 V (vs RHE).



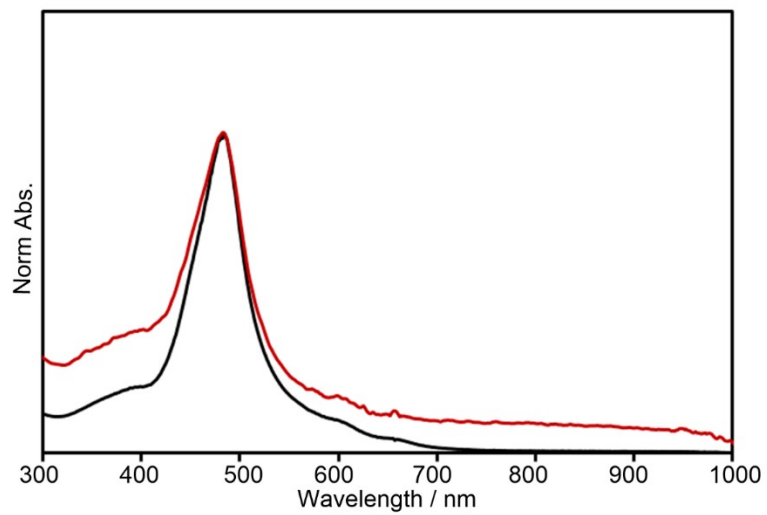

**Figure S14.** UV-Vis absorption spectra of **2Cu-1** before (black line) and after (red line) HER electrolysis.

**Table S2.** Crystal data of **Cu-1**.

|                                                              |                                                                                 |
|--------------------------------------------------------------|---------------------------------------------------------------------------------|
| Empirical formula                                            | C <sub>47</sub> H <sub>19</sub> CuF <sub>15</sub> N <sub>6</sub> O <sub>2</sub> |
| Formula weight                                               | 1048.22                                                                         |
| Temperature/K                                                | 193.00                                                                          |
| Crystal system                                               | triclinic                                                                       |
| Space group                                                  | <i>P</i> -1                                                                     |
| <i>a</i> /Å                                                  | 10.5020(5)                                                                      |
| <i>b</i> /Å                                                  | 13.5350(7)                                                                      |
| <i>c</i> /Å                                                  | 15.0523(8)                                                                      |
| $\alpha$ /°                                                  | 91.912(2)                                                                       |
| $\beta$ /°                                                   | 103.429(2)                                                                      |
| $\gamma$ /°                                                  | 99.557(2)                                                                       |
| Volume/Å <sup>3</sup>                                        | 2046.44(18)                                                                     |
| <i>Z</i>                                                     | 2                                                                               |
| $\rho_{\text{calc}}$ /g/cm <sup>3</sup>                      | 1.701                                                                           |
| $\mu$ /mm <sup>-1</sup>                                      | 0.654                                                                           |
| <i>F</i> (000)                                               | 1046.0                                                                          |
| Crystal size/mm <sup>3</sup>                                 | 0.13 × 0.12 × 0.1                                                               |
| Radiation                                                    | MoK $\alpha$ ( $\lambda$ = 0.71073)                                             |
| 2 $\theta$ range for data collection/°                       | 3.984 to 55.004                                                                 |
| Index ranges                                                 | -13 ≤ <i>h</i> ≤ 12, -17 ≤ <i>k</i> ≤ 17, -17 ≤ <i>l</i> ≤ 19                   |
| Reflections collected                                        | 19324                                                                           |
| Independent reflections                                      | 9345 [ <i>R</i> <sub>int</sub> = 0.0589, <i>R</i> <sub>sigma</sub> = 0.1015]    |
| Data/restraints/parameters                                   | 9345/411/742                                                                    |
| Goodness-of-fit on <i>F</i> <sup>2</sup>                     | 1.097                                                                           |
| Final <i>R</i> indexes [ <i>I</i> ≥ 2 $\sigma$ ( <i>I</i> )] | <i>R</i> <sub>1</sub> = 0.0695, <i>wR</i> <sub>2</sub> = 0.0942                 |
| Final <i>R</i> indexes [all data]                            | <i>R</i> <sub>1</sub> = 0.1287, <i>wR</i> <sub>2</sub> = 0.1156                 |
| Largest diff. peak/hole / e Å <sup>-3</sup>                  | 0.37/-0.43                                                                      |

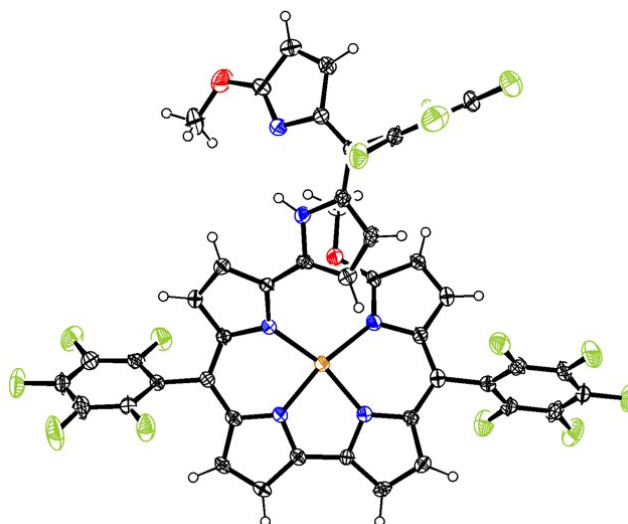**Figure S15.** Crystal structure of **Cu-1**. The thermal ellipsoids represent for 40% probability.**Table S3.** Crystal data of **2Cu-1**.

|                   |                                                                                                |
|-------------------|------------------------------------------------------------------------------------------------|
| Empirical formula | C <sub>46</sub> H <sub>14</sub> Cl <sub>4</sub> Cu <sub>2</sub> F <sub>15</sub> N <sub>6</sub> |
| Formula weight    | 1204.51                                                                                        |
| Temperature/K     | 193.15                                                                                         |

|                                                |                                                               |
|------------------------------------------------|---------------------------------------------------------------|
| Crystal system                                 | monoclinic                                                    |
| Space group                                    | P21/c                                                         |
| a/Å                                            | 8.8187(4)                                                     |
| b/Å                                            | 33.2549(14)                                                   |
| c/Å                                            | 16.0729(6)                                                    |
| $\alpha/^\circ$                                | 90                                                            |
| $\beta/^\circ$                                 | 95.606(2)                                                     |
| $\gamma/^\circ$                                | 90                                                            |
| Volume/Å <sup>3</sup>                          | 4691.1(3)                                                     |
| Z                                              | 4                                                             |
| $\rho_{\text{calc}}/\text{g}/\text{cm}^3$      | 1.705                                                         |
| $\mu/\text{mm}^{-1}$                           | 6.861                                                         |
| $F(000)$                                       | 2372.0                                                        |
| Radiation                                      | GaK $\alpha$ ( $\lambda = 1.34139$ )                          |
| 2 $\theta$ range for data collection/ $^\circ$ | 4.624 to 108.082                                              |
| Index ranges                                   | $-10 \leq h \leq 10, -40 \leq k \leq 39, -19 \leq l \leq 19$  |
| Reflections collected                          | 33962                                                         |
| Independent reflections                        | 8601 [ $R_{\text{int}} = 0.0757, R_{\text{sigma}} = 0.0766$ ] |
| Data/restraints/parameters                     | 8601/0/667                                                    |
| Goodness-of-fit on $F^2$                       | 1.071                                                         |
| Final R indexes [ $I \geq 2\sigma(I)$ ]        | $R_1 = 0.0612, wR_2 = 0.1504$                                 |
| Final R indexes [all data]                     | $R_1 = 0.1025, wR_2 = 0.1687$                                 |
| Largest diff. peak/hole / e Å <sup>-3</sup>    | 0.76/ -0.63                                                   |

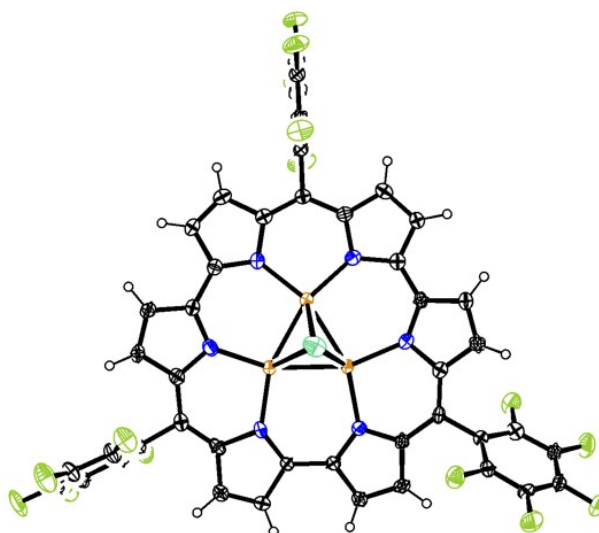

**Figure S16.** Crystal structure of **2Cu-1**. The thermal ellipsoids represent for 40% probability.

### 3, Cartesian Coordinates

|                       |    |              |              |              |
|-----------------------|----|--------------|--------------|--------------|
| <b>2Cu-1</b> Singlet, | 29 | -0.547427000 | 1.141737000  | -0.059270000 |
| CAM-B3LYP-            | 29 | 1.262721000  | -0.365631000 | 0.068384000  |

|                 |             |              |              |              |
|-----------------|-------------|--------------|--------------|--------------|
| D3(BJ)/Def2-SVP | 17          | -0.127067000 | -0.175285000 | 1.891247000  |
|                 | 17          | -0.140307000 | -0.320716000 | -1.838522000 |
|                 | 9           | -5.100854000 | -3.769909000 | 1.961222000  |
|                 | 9           | -6.855177000 | -5.805969000 | 1.987872000  |
|                 | 9           | -6.837849000 | -7.639286000 | -0.008978000 |
|                 | 9           | -5.049400000 | -7.427829000 | -2.035336000 |
|                 | 9           | -3.283206000 | -5.397842000 | -2.064209000 |
|                 | 9           | -3.117460000 | 5.378978000  | 2.022465000  |
|                 | 9           | -3.917361000 | 7.945367000  | 2.094605000  |
|                 | 9           | -3.165642000 | 9.656742000  | 0.131593000  |
|                 | 9           | -1.600489000 | 8.789228000  | -1.905005000 |
|                 | 9           | -0.785993000 | 6.225332000  | -1.977590000 |
|                 | 9           | 6.182116000  | -0.394602000 | -2.134314000 |
|                 | 9           | 8.831430000  | -0.877703000 | -2.146993000 |
|                 | 9           | 10.011517000 | -2.010764000 | 0.014879000  |
|                 | 9           | 8.528552000  | -2.664399000 | 2.188138000  |
|                 | 9           | 5.881063000  | -2.195389000 | 2.202855000  |
|                 | 7           | 2.853374000  | 0.850461000  | 0.039652000  |
|                 | 7           | 2.257983000  | -2.050720000 | 0.039755000  |
|                 | 7           | -0.694921000 | -2.970249000 | -0.019878000 |
|                 | 7           | -2.923903000 | -0.963018000 | -0.230119000 |
|                 | 7           | -2.306273000 | 1.985612000  | -0.222314000 |
|                 | 7           | 0.532633000  | 2.870139000  | 0.036506000  |
|                 | 6           | -5.067478000 | -4.652571000 | 0.976059000  |
|                 | 6           | -5.981654000 | -5.700583000 | 1.000795000  |
|                 | 6           | -5.973150000 | -6.642507000 | -0.022243000 |
|                 | 6           | -5.053670000 | -6.533780000 | -1.060848000 |
|                 | 6           | -4.147444000 | -5.480124000 | -1.064440000 |
|                 | 6           | -4.134587000 | -4.521193000 | -0.051792000 |
|                 | 6           | -3.159101000 | -3.393257000 | -0.068730000 |
|                 | 6           | -1.791308000 | -3.767626000 | 0.115387000  |
|                 | 6           | -1.337999000 | -5.077612000 | 0.404541000  |
|                 | 1           | -1.973722000 | -5.937651000 | 0.591119000  |
|                 | 6           | 0.039672000  | -5.046857000 | 0.409508000  |
|                 | 1           | 0.710140000  | -5.877620000 | 0.606847000  |
|                 | 6           | 0.437160000  | -3.715801000 | 0.139975000  |
|                 | 6           | 1.801273000  | -3.295617000 | 0.072489000  |
|                 | 6           | 2.915566000  | -4.240457000 | 0.070444000  |
|                 | 1           | 2.834530000  | -5.323465000 | 0.093457000  |
|                 | 6           | 4.045462000  | -3.499749000 | 0.047710000  |
| 1               | 5.069716000 | -3.860845000 | 0.017635000  |              |
| 6               | 3.632600000 | -2.101485000 | 0.034459000  |              |
| 6               | 4.483854000 | -1.006736000 | 0.027980000  |              |
| 6               | 5.948831000 | -1.286956000 | 0.029973000  |              |

|                       |    |              |              |              |
|-----------------------|----|--------------|--------------|--------------|
|                       | 6  | 6.582127000  | -1.865907000 | 1.128523000  |
|                       | 6  | 7.950431000  | -2.114377000 | 1.133785000  |
|                       | 6  | 8.712742000  | -1.777915000 | 0.020100000  |
|                       | 6  | 8.106032000  | -1.196278000 | -1.088675000 |
|                       | 6  | 6.737011000  | -0.956107000 | -1.071580000 |
|                       | 6  | 4.112259000  | 0.366938000  | 0.091879000  |
|                       | 6  | 5.053075000  | 1.457969000  | 0.266020000  |
|                       | 1  | 6.133220000  | 1.368197000  | 0.339719000  |
|                       | 6  | 4.315448000  | 2.594935000  | 0.319372000  |
|                       | 1  | 4.681654000  | 3.608027000  | 0.455894000  |
|                       | 6  | 2.926202000  | 2.192848000  | 0.183417000  |
|                       | 6  | 1.850976000  | 3.108534000  | 0.232162000  |
|                       | 6  | 2.066802000  | 4.523520000  | 0.505568000  |
|                       | 1  | 3.021110000  | 4.993440000  | 0.722553000  |
|                       | 6  | 0.850911000  | 5.110693000  | 0.480895000  |
|                       | 1  | 0.618191000  | 6.157190000  | 0.656490000  |
|                       | 6  | -0.108644000 | 4.063370000  | 0.165087000  |
|                       | 6  | -1.482503000 | 4.298916000  | -0.026966000 |
|                       | 6  | -1.927539000 | 5.721828000  | 0.018819000  |
|                       | 6  | -1.553732000 | 6.625029000  | -0.975434000 |
|                       | 6  | -1.965547000 | 7.952455000  | -0.948432000 |
|                       | 6  | -2.769820000 | 8.398499000  | 0.095371000  |
|                       | 6  | -3.155886000 | 7.518846000  | 1.101398000  |
|                       | 6  | -2.734831000 | 6.194465000  | 1.052888000  |
|                       | 6  | -2.483938000 | 3.344053000  | -0.233363000 |
|                       | 6  | -3.869487000 | 3.639280000  | -0.527057000 |
|                       | 1  | -4.305171000 | 4.629834000  | -0.623694000 |
|                       | 6  | -4.485111000 | 2.442546000  | -0.714623000 |
|                       | 1  | -5.533842000 | 2.272532000  | -0.940978000 |
|                       | 6  | -3.480666000 | 1.420908000  | -0.496038000 |
|                       | 6  | -3.772509000 | 0.011535000  | -0.482705000 |
|                       | 6  | -5.134860000 | -0.494852000 | -0.720374000 |
|                       | 1  | -6.012901000 | 0.098243000  | -0.961265000 |
|                       | 6  | -5.063610000 | -1.831225000 | -0.575550000 |
|                       | 1  | -5.865203000 | -2.556550000 | -0.686704000 |
|                       | 6  | -3.659578000 | -2.126672000 | -0.269145000 |
|                       | 1  | -0.742045000 | -1.975063000 | -0.277389000 |
| <b>2Cu-1</b> Triplet, | 29 | -0.669095000 | 1.084168000  | 0.017503000  |
| CAM-B3LYP-            | 29 | 1.290075000  | -0.186815000 | 0.097956000  |
| D3(BJ)/Def2-          | 17 | -0.167973000 | -0.254153000 | 1.886524000  |

|     |             |              |              |              |
|-----|-------------|--------------|--------------|--------------|
| SVP | 17          | -0.050101000 | -0.267261000 | -1.817895000 |
|     | 9           | -4.543751000 | -4.474588000 | 1.993536000  |
|     | 9           | -6.026974000 | -6.716210000 | 1.967399000  |
|     | 9           | -5.853878000 | -8.434414000 | -0.122160000 |
|     | 9           | -4.182000000 | -7.900799000 | -2.188381000 |
|     | 9           | -2.685610000 | -5.663381000 | -2.164344000 |
|     | 9           | -3.525085000 | 5.135448000  | 2.138572000  |
|     | 9           | -4.621662000 | 7.593180000  | 2.145117000  |
|     | 9           | -4.289443000 | 9.231675000  | 0.011005000  |
|     | 9           | -2.848039000 | 8.402931000  | -2.130072000 |
|     | 9           | -1.736542000 | 5.950744000  | -2.136337000 |
|     | 9           | 6.188110000  | 0.318495000  | -2.129239000 |
|     | 9           | 8.870541000  | 0.097137000  | -2.162112000 |
|     | 9           | 10.175179000 | -0.894587000 | -0.002643000 |
|     | 9           | 8.783078000  | -1.670783000 | 2.190412000  |
|     | 9           | 6.100461000  | -1.462825000 | 2.225130000  |
|     | 7           | 2.732674000  | 1.205002000  | 0.099824000  |
|     | 7           | 2.481136000  | -1.748269000 | 0.081087000  |
|     | 7           | -0.345289000 | -3.036058000 | -0.029787000 |
|     | 7           | -2.798240000 | -1.310605000 | -0.141220000 |
|     | 7           | -2.527125000 | 1.705010000  | -0.109760000 |
|     | 7           | 0.198625000  | 2.934928000  | 0.078742000  |
|     | 6           | -4.437685000 | -5.297158000 | 0.962449000  |
|     | 6           | -5.211276000 | -6.453076000 | 0.960517000  |
|     | 6           | -5.122413000 | -7.336186000 | -0.110138000 |
|     | 6           | -4.263092000 | -7.061796000 | -1.169482000 |
|     | 6           | -3.496956000 | -5.902442000 | -1.145841000 |
|     | 6           | -3.568695000 | -4.999036000 | -0.086031000 |
|     | 6           | -2.739634000 | -3.759075000 | -0.075747000 |
|     | 6           | -1.333433000 | -3.972516000 | 0.070506000  |
|     | 6           | -0.718561000 | -5.221669000 | 0.314556000  |
|     | 1           | -1.239291000 | -6.162273000 | 0.465495000  |
|     | 6           | 0.644780000  | -5.013642000 | 0.339908000  |
|     | 1           | 1.414848000  | -5.757824000 | 0.517544000  |
|     | 6           | 0.870572000  | -3.633808000 | 0.121587000  |
|     | 6           | 2.173369000  | -3.044645000 | 0.080662000  |
|     | 6           | 3.387242000  | -3.844363000 | 0.036521000  |
|     | 1           | 3.436935000  | -4.929061000 | 0.011297000  |
|     | 6           | 4.423764000  | -2.971045000 | 0.001042000  |
|     | 1           | 5.482648000  | -3.206913000 | -0.055705000 |
| 6   | 3.849373000 | -1.641745000 | 0.042654000  |              |
| 6   | 4.575586000 | -0.444171000 | 0.064248000  |              |
| 6   | 6.062270000 | -0.567172000 | 0.047881000  |              |
| 6   | 6.758737000 | -1.073974000 | 1.143763000  |              |

|                       |    |              |              |              |
|-----------------------|----|--------------|--------------|--------------|
|                       | 6  | 8.144448000  | -1.188425000 | 1.137899000  |
|                       | 6  | 8.859965000  | -0.789539000 | 0.013637000  |
|                       | 6  | 8.189348000  | -0.280085000 | -1.093649000 |
|                       | 6  | 6.803387000  | -0.173691000 | -1.065352000 |
|                       | 6  | 4.056276000  | 0.865483000  | 0.113171000  |
|                       | 6  | 4.861420000  | 2.066104000  | 0.208006000  |
|                       | 1  | 5.946159000  | 2.107600000  | 0.248854000  |
|                       | 6  | 3.995034000  | 3.108028000  | 0.251405000  |
|                       | 1  | 4.240382000  | 4.163207000  | 0.324192000  |
|                       | 6  | 2.657609000  | 2.539737000  | 0.179212000  |
|                       | 6  | 1.479143000  | 3.342145000  | 0.189313000  |
|                       | 6  | 1.538188000  | 4.780414000  | 0.312243000  |
|                       | 1  | 2.437091000  | 5.379292000  | 0.422544000  |
|                       | 6  | 0.254514000  | 5.225988000  | 0.269123000  |
|                       | 1  | -0.089383000 | 6.253495000  | 0.343944000  |
|                       | 6  | -0.577096000 | 4.059162000  | 0.113603000  |
|                       | 6  | -1.984671000 | 4.108420000  | -0.002907000 |
|                       | 6  | -2.596686000 | 5.470105000  | 0.001084000  |
|                       | 6  | -2.439996000 | 6.332913000  | -1.082035000 |
|                       | 6  | -3.007040000 | 7.602194000  | -1.089866000 |
|                       | 6  | -3.747819000 | 8.028256000  | 0.007975000  |
|                       | 6  | -3.918137000 | 7.186408000  | 1.102032000  |
|                       | 6  | -3.344883000 | 5.919509000  | 1.087332000  |
|                       | 6  | -2.869551000 | 3.040271000  | -0.127459000 |
|                       | 6  | -4.298103000 | 3.157833000  | -0.303837000 |
|                       | 1  | -4.859104000 | 4.085905000  | -0.367931000 |
|                       | 6  | -4.782985000 | 1.891231000  | -0.386586000 |
|                       | 1  | -5.817736000 | 1.591573000  | -0.522496000 |
|                       | 6  | -3.646948000 | 1.004014000  | -0.259043000 |
|                       | 6  | -3.769232000 | -0.438710000 | -0.284222000 |
|                       | 6  | -5.074364000 | -1.091528000 | -0.462937000 |
|                       | 1  | -6.031183000 | -0.598519000 | -0.610691000 |
|                       | 6  | -4.836550000 | -2.416904000 | -0.410244000 |
|                       | 1  | -5.554331000 | -3.226001000 | -0.514983000 |
|                       | 6  | -3.395231000 | -2.556856000 | -0.201613000 |
|                       | 1  | -0.524061000 | -2.047724000 | -0.244288000 |
| <b>2Cu-1</b> Quintet, | 29 | 1.379075000  | 0.254188000  | 0.062057000  |
| CAM-B3LYP-            | 29 | -1.420917000 | -0.139227000 | 0.526376000  |
| D3(BJ)/Def2-          | 17 | -0.007185000 | -0.852359000 | -1.321402000 |

|     |              |               |              |              |
|-----|--------------|---------------|--------------|--------------|
| SVP | 17           | -0.091389000  | -0.175935000 | 2.318590000  |
|     | 9            | 3.482656000   | -3.596074000 | -1.764384000 |
|     | 9            | 4.956840000   | -5.591067000 | -2.802124000 |
|     | 9            | 4.759613000   | -8.096118000 | -1.781842000 |
|     | 9            | 3.089419000   | -8.587307000 | 0.298885000  |
|     | 9            | 1.636618000   | -6.603062000 | 1.360509000  |
|     | 9            | 5.337618000   | 3.613908000  | -1.186435000 |
|     | 9            | 6.691281000   | 5.928925000  | -1.369085000 |
|     | 9            | 5.606902000   | 8.215921000  | -0.396352000 |
|     | 9            | 3.155644000   | 8.174204000  | 0.760487000  |
|     | 9            | 1.795066000   | 5.865560000  | 0.949738000  |
|     | 9            | -5.899077000  | 2.378468000  | 1.462970000  |
|     | 9            | -8.508444000  | 2.990108000  | 1.210719000  |
|     | 9            | -10.082092000 | 1.549568000  | -0.462304000 |
|     | 9            | -9.032065000  | -0.507170000 | -1.883642000 |
|     | 9            | -6.428580000  | -1.122420000 | -1.640398000 |
|     | 7            | -2.375610000  | 1.171677000  | -0.431208000 |
|     | 7            | -2.952643000  | -1.320696000 | 0.774356000  |
|     | 7            | -0.508888000  | -3.056953000 | 0.991451000  |
|     | 7            | 2.450666000   | -1.505547000 | 0.866989000  |
|     | 7            | 2.899909000   | 1.122098000  | 0.840848000  |
|     | 7            | 0.634943000   | 2.200661000  | -0.536950000 |
|     | 6            | 3.367013000   | -4.809643000 | -1.249227000 |
|     | 6            | 4.137345000   | -5.830148000 | -1.791509000 |
|     | 6            | 4.035260000   | -7.116763000 | -1.271468000 |
|     | 6            | 3.173738000   | -7.367853000 | -0.209652000 |
|     | 6            | 2.416279000   | -6.329804000 | 0.321627000  |
|     | 6            | 2.482979000   | -5.031044000 | -0.188038000 |
|     | 6            | 1.713655000   | -3.895205000 | 0.371883000  |
|     | 6            | 0.337402000   | -3.994596000 | 0.448393000  |
|     | 6            | -0.496957000  | -5.088185000 | 0.023636000  |
|     | 1            | -0.143248000  | -5.984378000 | -0.476895000 |
|     | 6            | -1.793969000  | -4.781206000 | 0.339717000  |
|     | 1            | -2.681121000  | -5.369574000 | 0.119141000  |
|     | 6            | -1.803601000  | -3.470195000 | 0.898185000  |
|     | 6            | -2.954175000  | -2.644477000 | 0.999717000  |
|     | 6            | -4.314541000  | -3.111299000 | 1.132782000  |
|     | 1            | -4.610691000  | -4.136486000 | 1.342911000  |
|     | 6            | -5.120207000  | -2.029237000 | 0.957803000  |
|     | 1            | -6.206430000  | -2.004966000 | 0.986288000  |
| 6   | -4.259533000 | -0.906766000  | 0.650730000  |              |
| 6   | -4.634474000 | 0.294120000   | 0.068260000  |              |
| 6   | -6.083740000 | 0.600283000   | -0.067519000 |              |
| 6   | -6.915181000 | -0.118270000  | -0.925441000 |              |



|                      |    |              |              |              |
|----------------------|----|--------------|--------------|--------------|
|                      | 6  | -8.263978000 | 0.191237000  | -1.063652000 |
|                      | 6  | -8.803063000 | 1.247939000  | -0.338039000 |
|                      | 6  | -7.994330000 | 1.986505000  | 0.519819000  |
|                      | 6  | -6.649156000 | 1.659099000  | 0.643367000  |
|                      | 6  | -3.731510000 | 1.232701000  | -0.521448000 |
|                      | 6  | -4.085032000 | 2.327733000  | -1.351981000 |
|                      | 1  | -5.094197000 | 2.629285000  | -1.619523000 |
|                      | 6  | -2.906106000 | 2.912046000  | -1.760555000 |
|                      | 1  | -2.815968000 | 3.782317000  | -2.401969000 |
|                      | 6  | -1.836788000 | 2.182115000  | -1.161435000 |
|                      | 6  | -0.464838000 | 2.624163000  | -1.201204000 |
|                      | 6  | -0.182440000 | 3.865256000  | -1.903556000 |
|                      | 1  | -0.873384000 | 4.401775000  | -2.544204000 |
|                      | 6  | 1.070783000  | 4.234267000  | -1.569023000 |
|                      | 1  | 1.609244000  | 5.121829000  | -1.888961000 |
|                      | 6  | 1.581155000  | 3.221150000  | -0.676692000 |
|                      | 6  | 2.785465000  | 3.375140000  | 0.005077000  |
|                      | 6  | 3.519393000  | 4.663096000  | -0.116244000 |
|                      | 6  | 2.988310000  | 5.856041000  | 0.376263000  |
|                      | 6  | 3.681282000  | 7.057822000  | 0.284498000  |
|                      | 6  | 4.940617000  | 7.080345000  | -0.305764000 |
|                      | 6  | 5.496199000  | 5.906144000  | -0.802987000 |
|                      | 6  | 4.785306000  | 4.715851000  | -0.700951000 |
|                      | 6  | 3.368666000  | 2.382678000  | 0.812673000  |
|                      | 6  | 4.552891000  | 2.457672000  | 1.637962000  |
|                      | 1  | 5.142197000  | 3.353376000  | 1.819401000  |
|                      | 6  | 4.774988000  | 1.203324000  | 2.132435000  |
|                      | 1  | 5.581004000  | 0.876224000  | 2.784932000  |
|                      | 6  | 3.729697000  | 0.369347000  | 1.594539000  |
|                      | 6  | 3.507406000  | -1.005221000 | 1.613669000  |
|                      | 6  | 4.274780000  | -2.056879000 | 2.184930000  |
|                      | 1  | 5.150898000  | -1.941540000 | 2.819106000  |
|                      | 6  | 3.686210000  | -3.213737000 | 1.754777000  |
|                      | 1  | 3.976738000  | -4.236402000 | 1.983308000  |
|                      | 6  | 2.547352000  | -2.837715000 | 0.948512000  |
|                      | 1  | -0.200423000 | -2.190994000 | 1.441424000  |
| <b>2Cu-1 Triplet</b> | 29 | -0.547257000 | 1.188163000  | 0.044297000  |
| <b>PBE-</b>          | 29 | 1.303612000  | -0.346859000 | 0.118673000  |
| <b>D3(BJ)/Def2-</b>  | 17 | -0.190615000 | -0.243071000 | 1.894322000  |

|     |             |              |              |              |
|-----|-------------|--------------|--------------|--------------|
| SVP | 17          | -0.098414000 | -0.286202000 | -1.765236000 |
|     | 9           | -5.127824000 | -3.895647000 | 1.995436000  |
|     | 9           | -6.914932000 | -5.942454000 | 1.922688000  |
|     | 9           | -6.894575000 | -7.704203000 | -0.170387000 |
|     | 9           | -5.080799000 | -7.410922000 | -2.198818000 |
|     | 9           | -3.287724000 | -5.369848000 | -2.133082000 |
|     | 9           | -3.110710000 | 5.522931000  | 2.033704000  |
|     | 9           | -3.940110000 | 8.111623000  | 1.984589000  |
|     | 9           | -3.216473000 | 9.741288000  | -0.091240000 |
|     | 9           | -1.656671000 | 8.773492000  | -2.121284000 |
|     | 9           | -0.821611000 | 6.187532000  | -2.079315000 |
|     | 9           | 6.236206000  | -0.332666000 | -2.097165000 |
|     | 9           | 8.901702000  | -0.872056000 | -2.137449000 |
|     | 9           | 10.080044000 | -2.105444000 | 0.002077000  |
|     | 9           | 8.583988000  | -2.801949000 | 2.184775000  |
|     | 9           | 5.917340000  | -2.269924000 | 2.231433000  |
|     | 7           | 2.872789000  | 0.862395000  | 0.150437000  |
|     | 7           | 2.280021000  | -2.036773000 | 0.099424000  |
|     | 7           | -0.703793000 | -2.991936000 | 0.010905000  |
|     | 7           | -2.935466000 | -0.986164000 | -0.124422000 |
|     | 7           | -2.309196000 | 2.009643000  | -0.119993000 |
|     | 7           | 0.535460000  | 2.897733000  | 0.127382000  |
|     | 6           | -5.100118000 | -4.739965000 | 0.960871000  |
|     | 6           | -6.028648000 | -5.794125000 | 0.936334000  |
|     | 6           | -6.018175000 | -6.701487000 | -0.137424000 |
|     | 6           | -5.083101000 | -6.553054000 | -1.176644000 |
|     | 6           | -4.161987000 | -5.494371000 | -1.129542000 |
|     | 6           | -4.150977000 | -4.570024000 | -0.066067000 |
|     | 6           | -3.172491000 | -3.442821000 | -0.040800000 |
|     | 6           | -1.809036000 | -3.816322000 | 0.102329000  |
|     | 6           | -1.331070000 | -5.149896000 | 0.326379000  |
|     | 1           | -1.967874000 | -6.027286000 | 0.474319000  |
|     | 6           | 0.050462000  | -5.102470000 | 0.337729000  |
|     | 1           | 0.739575000  | -5.936275000 | 0.499228000  |
|     | 6           | 0.441781000  | -3.736048000 | 0.135590000  |
|     | 6           | 1.809187000  | -3.310538000 | 0.080467000  |
|     | 6           | 2.918875000  | -4.245425000 | 0.003774000  |
|     | 1           | 2.839857000  | -5.336188000 | -0.045018000 |
|     | 6           | 4.068530000  | -3.492070000 | -0.030961000 |
|     | 1           | 5.099250000  | -3.852483000 | -0.111085000 |
| 6   | 3.658596000 | -2.104121000 | 0.045951000  |              |
| 6   | 4.533256000 | -0.989491000 | 0.088484000  |              |
| 6   | 5.995984000 | -1.287807000 | 0.066944000  |              |
| 6   | 6.627189000 | -1.924627000 | 1.152832000  |              |

|   |              |              |              |
|---|--------------|--------------|--------------|
| 6 | 8.003648000  | -2.204203000 | 1.142343000  |
| 6 | 8.773875000  | -1.843982000 | 0.022781000  |
| 6 | 8.168038000  | -1.207914000 | -1.074786000 |
| 6 | 6.790535000  | -0.935213000 | -1.041143000 |
| 6 | 4.166971000  | 0.374889000  | 0.166343000  |
| 6 | 5.101783000  | 1.477947000  | 0.307209000  |
| 1 | 6.191906000  | 1.391335000  | 0.362198000  |
| 6 | 4.348058000  | 2.621741000  | 0.378500000  |
| 1 | 4.714636000  | 3.647118000  | 0.487489000  |
| 6 | 2.952188000  | 2.213006000  | 0.274510000  |
| 6 | 1.866389000  | 3.148913000  | 0.291742000  |
| 6 | 2.091558000  | 4.576380000  | 0.469448000  |
| 1 | 3.059523000  | 5.059908000  | 0.632981000  |
| 6 | 0.864345000  | 5.182129000  | 0.399971000  |
| 1 | 0.636887000  | 6.247942000  | 0.504036000  |
| 6 | -0.104766000 | 4.125336000  | 0.172797000  |
| 6 | -1.491200000 | 4.351857000  | -0.001662000 |
| 6 | -1.939973000 | 5.776100000  | -0.020825000 |
| 6 | -1.579556000 | 6.637850000  | -1.075026000 |
| 6 | -2.004354000 | 7.976170000  | -1.109279000 |
| 6 | -2.807781000 | 8.473494000  | -0.068408000 |
| 6 | -3.180566000 | 7.634803000  | 0.996529000  |
| 6 | -2.746358000 | 6.298983000  | 1.008663000  |
| 6 | -2.500525000 | 3.375455000  | -0.172676000 |
| 6 | -3.899298000 | 3.661216000  | -0.433160000 |
| 1 | -4.339385000 | 4.657506000  | -0.544239000 |
| 6 | -4.533625000 | 2.447304000  | -0.527605000 |
| 1 | -5.596263000 | 2.268746000  | -0.718750000 |
| 6 | -3.520030000 | 1.423522000  | -0.324424000 |
| 6 | -3.811038000 | 0.018446000  | -0.326006000 |
| 6 | -5.179858000 | -0.484085000 | -0.539215000 |
| 1 | -6.075394000 | 0.116022000  | -0.732389000 |
| 6 | -5.098630000 | -1.843401000 | -0.448701000 |
| 1 | -5.906620000 | -2.573530000 | -0.567243000 |
| 6 | -3.684645000 | -2.138420000 | -0.187564000 |
| 1 | -0.767012000 | -1.973681000 | -0.182944000 |
